# Supplementary material
Source: PubMed Central journal article supplement (PMC3827973)
Supplement: NIHMS522602-supplement-01.pdf [file NIHMS522602-supplement-01.pdf]

**Table S1.** Questionnaire validated by Froehlich et al to determine the risk of LTBI reactivation with a targeted screening approach.

| Question                                                                                         | Supporting references |
|--------------------------------------------------------------------------------------------------|-----------------------|
| <i>Nine-item questionnaire validated by Froelich et al<sup>27</sup></i>                          |                       |
| 1. Child received BCG vaccine?                                                                   | 1, 7                  |
| 2. Child or household member with history of active TB or positive TST?                          | 1, 6, 14, 60, 80      |
| 3. Child born outside the United States?                                                         | 1, 6, 7, 27, 60, 80   |
| 4. Child lived outside the United States (> one month)?                                          | 1, 6, 60, 64, 80      |
| 5. Household member born outside the United States?                                              | 6, 14, 64, 76         |
| 6. Household member with HIV?                                                                    | 6, 14, 60, 76         |
| 7. Household member who is employed in a prison or has been imprisoned (in the last five years)? |                       |
| 8. Household member lived in homeless shelter?                                                   |                       |
| 9. Child a foster child or adopted?                                                              |                       |
| <i>Additional questions to consider depending on the population of interest</i>                  |                       |
| 1. Raw milk consumption?                                                                         | 6                     |
| 2. Child with HIV/immunodeficiency?                                                              | 7, 14, 60             |
| 3. Child with intravenous drug use, diabetes, or renal failure?                                  | 7                     |

**Work Cited**

Froehlich H, Ackerson LM, Morozumi PA. Targeted testing of children for tuberculosis: validation of a risk assessment questionnaire. *Pediatrics*. 2001;107(4):E54.
